# Supplementary material
Source: publisher figshare collection journal article supplement (https://springernature.figshare.com/ndownloader/files/15338516)
Supplement: Supplementary file 1 [file 15338516]

## Sheet: EIA_SIA details
Code name:	Reviewer ID	EIA_SIA ID	Reference document [name]	Reference document [file location]	Year of publication	Project proponent	Type of the document	Location of the proposed activity 1	Location of the proposed activity 2	Location of the proposed activity 3	Latitude	Longitude	Impact assessment method (description)	Type of mining [ore]	Type or mine	Calculation of the significance of the impact	Actors engaged or consulted during EIA/SIA process	Sources used for evaluation of impacts [if stated]	estimate of the operating capacity of a mine (years)	Project infrastructure
Code description:	Name of the reviewer who is extracting the meta-data	Unique document ID	Name of the reference document	Location of the reference document	Year of publication	Name of the project proponent/developer	e.g. Environmental Impact Statement Summary; Social Impact Assessment	Country	Region or state	Specific name of the locality	Coordinates	Coordinates	Excerpt from the document on employed impact assessment method	Type of ore to be extracted	Type of mining activity	Excerpt from the document on calculation of the significance of the impact	E.g. local community representatives	E.g. scientific literature, technical reports, internal sources/past reports, consultations	Estimated mine life	Excerpt from the document on infrastructure to be constructed

## Sheet: Impacts
Code name:	Reviewer ID	EIA_SIA ID	Impact ID	System affected	Component affected	Impact (description)	Who is considered affected? [if stated]	Sources of impact: Construction [C], Operation [O], Maintenance [M], Decomissioning [D]	Construction	Operation	Maintenance	Decomissioning	Remediation	Mine abandonment	Mine expansion	Contaminant	Measurement	Estimated significance of the impact	Source of the information
Code description:	Name of the reviewer who is extracting the meta-data	Unique document ID	Unique impact ID	E.g. Land, Water, Air, Biodiversity, Human environment	E.g. soil surface, ground water, air quality	Description of the impact (e.g. soil compaction)	E.g.local residents, general public	Stages of the mining activity at which impact occurred: construction [C], operation [O], maintenance [M], etc	Description of the activity that caused impact	Description of the activity that caused impact		Description of the activity that caused impact				The main source of the impact (e.g. heavy metal)	E.g. particles per million, dB, etc.	Description from the text	Page from which the meta-data was extracted or specify the table number

## Sheet: Mitigation
Code name:	Reviewer ID	EIA_SIA ID	Impact ID	Mitigation measure ID	System affected	Component affected	Mitigation measure (description)	Source of the information
Code description:	Name of the reviewer who is extracting the meta-data	Unique document ID	Unique impact ID	Unique mitigation measure ID	E.g. Land, Water, Air, Biodiversity, Human environment	E.g. soil surface, ground water, air quality	Description of the mitigation measure (e.g. reduction of the slope of work areas)	Page from which the meta-data was extracted or specify the table number
